# Supplementary material for: Identification of estrogen responsive genes using esophageal squamous cell carcinoma (ESCC) as a model
Source: BMC Syst Biol. 2012 Oct 26;6:135. doi: 10.1186/1752-0509-6-135 (PMC3495646; doi:10.1186/1752-0509-6-135)
Supplement: Additional file 4 — Pathways enriched in the Four ESCC gene categories. Appendix IV.xls contains details of the enriched KEGG pathways in the four gene categories. [file 1752-0509-6-135-S4.xlsx]

## Sheet: C1
CLASS C1
PATHWAY	#HIT_SET	#HIT_BG	#NOHIT_SET	#NOHIT_BG	PVALUE	FDRADJ	DESC	GENES-IN-SET-WITH-PATHWAY	GENE-SYMBOL	GENE-NAME
path:hsa05200	19	309	23	5875	4.55817e-14	2.68932e-12	Pathways in cancer - Homo sapiens (human)	5914,25,1026,598,2335,3815,3480,596,7422,2122,1956,1495,324,3655,5915,1499,4233,6256,2249	RARA,ABL1,CDKN1A,BCL2L1,FN1,KIT,IGF1R,BCL2,VEGFA,MECOM,EGFR,CTNNA1,APC,ITGA6,RARB,CTNNB1,MET,RXRA,FGF4	retinoic acid receptor, alpha,c-abl oncogene 1, non-receptor tyrosine kinase,cyclin-dependent kinase inhibitor 1A (p21, Cip1),BCL2-like 1,fibronectin 1,v-kit Hardy-Zuckerman 4 feline sarcoma viral oncogene homolog,insulin-like growth factor 1 receptor,B-cell CLL/lymphoma 2,vascular endothelial growth factor A,MDS1 and EVI1 complex locus,epidermal growth factor receptor,catenin (cadherin-associate…
path:hsa04510	11	189	31	5995	5.11111e-08	1.50778e-06	Focal adhesion - Homo sapiens (human)	2321,2335,596,3480,3791,1956,7422,3655,1499,6714,4233	FLT1,FN1,BCL2,IGF1R,KDR,EGFR,VEGFA,ITGA6,CTNNB1,SRC,MET	fms-related tyrosine kinase 1 (vascular endothelial growth factor/vascular permeability factor receptor),fibronectin 1,B-cell CLL/lymphoma 2,insulin-like growth factor 1 receptor,kinase insert domain receptor (a type III receptor tyrosine kinase),epidermal growth factor receptor,vascular endothelial growth factor A,integrin, alpha 6,catenin (cadherin-associated protein), beta 1, 88kDa,v-src sarco…
path:hsa05202	9	171	33	6013	2.26217e-06	4.44893e-05	Transcriptional misregulation in cancer - Homo sapiens (human)	2321,1026,3480,7490,5087,598,5914,4233,6256	FLT1,CDKN1A,IGF1R,WT1,PBX1,BCL2L1,RARA,MET,RXRA	fms-related tyrosine kinase 1 (vascular endothelial growth factor/vascular permeability factor receptor),cyclin-dependent kinase inhibitor 1A (p21, Cip1),insulin-like growth factor 1 receptor,Wilms tumor 1,pre-B-cell leukemia homeobox 1,BCL2-like 1,retinoic acid receptor, alpha,met proto-oncogene (hepatocyte growth factor receptor),retinoid X receptor, alpha
path:hsa04520	6	67	36	6117	7.92682e-06	0.000116921	Adherens junction - Homo sapiens (human)	3480,1956,1495,1499,6714,4233	IGF1R,EGFR,CTNNA1,CTNNB1,SRC,MET	insulin-like growth factor 1 receptor,epidermal growth factor receptor,catenin (cadherin-associated protein), alpha 1, 102kDa,catenin (cadherin-associated protein), beta 1, 88kDa,v-src sarcoma (Schmidt-Ruppin A-2) viral oncogene homolog (avian),met proto-oncogene (hepatocyte growth factor receptor)
path:hsa05222	6	81	36	6103	2.19295e-05	0.000258768	Small cell lung cancer - Homo sapiens (human)	2335,596,598,5915,3655,6256	FN1,BCL2,BCL2L1,RARB,ITGA6,RXRA	fibronectin 1,B-cell CLL/lymphoma 2,BCL2-like 1,retinoic acid receptor, beta,integrin, alpha 6,retinoid X receptor, alpha
path:hsa04144	8	194	34	5990	4.88037e-05	0.000479903	Endocytosis - Homo sapiens (human)	2321,3815,1601,3480,3791,1956,6714,4233	FLT1,KIT,DAB2,IGF1R,KDR,EGFR,SRC,MET	fms-related tyrosine kinase 1 (vascular endothelial growth factor/vascular permeability factor receptor),v-kit Hardy-Zuckerman 4 feline sarcoma viral oncogene homolog,disabled homolog 2, mitogen-responsive phosphoprotein (Drosophila),insulin-like growth factor 1 receptor,kinase insert domain receptor (a type III receptor tyrosine kinase),epidermal growth factor receptor,v-src sarcoma (Schmidt-Rup…
path:hsa05100	5	65	37	6119	9.57783e-05	0.000756114	Bacterial invasion of epithelial cells - Homo sapiens (human)	1499,6714,4233,1495,2335	CTNNB1,SRC,MET,CTNNA1,FN1	catenin (cadherin-associated protein), beta 1, 88kDa,v-src sarcoma (Schmidt-Ruppin A-2) viral oncogene homolog (avian),met proto-oncogene (hepatocyte growth factor receptor),catenin (cadherin-associated protein), alpha 1, 102kDa,fibronectin 1
path:hsa05218	5	66	37	6118	0.000102524	0.000756114	Melanoma - Homo sapiens (human)	3480,1956,1026,4233,2249	IGF1R,EGFR,CDKN1A,MET,FGF4	insulin-like growth factor 1 receptor,epidermal growth factor receptor,cyclin-dependent kinase inhibitor 1A (p21, Cip1),met proto-oncogene (hepatocyte growth factor receptor),fibroblast growth factor 4
path:hsa05215	5	84	37	6100	0.00029891	0.00195952	Prostate cancer - Homo sapiens (human)	1499,1956,1026,596,3480	CTNNB1,EGFR,CDKN1A,BCL2,IGF1R	catenin (cadherin-associated protein), beta 1, 88kDa,epidermal growth factor receptor,cyclin-dependent kinase inhibitor 1A (p21, Cip1),B-cell CLL/lymphoma 2,insulin-like growth factor 1 receptor
path:hsa05213	4	48	38	6136	0.000383132	0.00226048	Endometrial cancer - Homo sapiens (human)	1499,1956,1495,324	CTNNB1,EGFR,CTNNA1,APC	catenin (cadherin-associated protein), beta 1, 88kDa,epidermal growth factor receptor,catenin (cadherin-associated protein), alpha 1, 102kDa,adenomatous polyposis coli
path:hsa04110	5	119	37	6065	0.00136295	0.00683645	Cell cycle - Homo sapiens (human)	983,25,1026,5934,4173	CDK1,ABL1,CDKN1A,RBL2,MCM4	cyclin-dependent kinase 1,c-abl oncogene 1, non-receptor tyrosine kinase,cyclin-dependent kinase inhibitor 1A (p21, Cip1),retinoblastoma-like 2 (p130),minichromosome maintenance complex component 4
path:hsa05220	4	69	38	6115	0.00139047	0.00683645	Chronic myeloid leukemia - Homo sapiens (human)	598,25,1026,2122	BCL2L1,ABL1,CDKN1A,MECOM	BCL2-like 1,c-abl oncogene 1, non-receptor tyrosine kinase,cyclin-dependent kinase inhibitor 1A (p21, Cip1),MDS1 and EVI1 complex locus
path:hsa04060	7	258	35	5926	0.00175356	0.00795846	Cytokine-cytokine receptor interaction - Homo sapiens (human)	2321,3815,3791,3570,1956,7422,4233	FLT1,KIT,KDR,IL6R,EGFR,VEGFA,MET	fms-related tyrosine kinase 1 (vascular endothelial growth factor/vascular permeability factor receptor),v-kit Hardy-Zuckerman 4 feline sarcoma viral oncogene homolog,kinase insert domain receptor (a type III receptor tyrosine kinase),interleukin 6 receptor,epidermal growth factor receptor,vascular endothelial growth factor A,met proto-oncogene (hepatocyte growth factor receptor)
CLASS C2
PATHWAY	#HIT_SET	#HIT_BG	#NOHIT_SET	#NOHIT_BG	PVALUE	FDRADJ	DESC	GENES-IN-SET-WITH-PATHWAY	GENE-SYMBOL	GENE-NAME
path:hsa05200	13	315	34	5864	5.2493e-07	3.93698e-05	Pathways in cancer - Homo sapiens (human)	4313,5595,581,6774,7428,999,4193,3918,4436,7477,5970,4790,4843	MMP2,MAPK3,BAX,STAT3,VHL,CDH1,MDM2,LAMC2,MSH2,WNT7B,RELA,NFKB1,NOS2	matrix metallopeptidase 2 (gelatinase A, 72kDa gelatinase, 72kDa type IV collagenase),mitogen-activated protein kinase 3,BCL2-associated X protein,signal transducer and activator of transcription 3 (acute-phase response factor),von Hippel-Lindau tumor suppressor, E3 ubiquitin protein ligase,cadherin 1, type 1, E-cadherin (epithelial),Mdm2, p53 E3 ubiquitin protein ligase homolog (mouse),laminin, …
path:hsa05146	6	102	41	6077	0.000142782	0.00360076	Amoebiasis - Homo sapiens (human)	81,3918,5970,4790,4583,4843	ACTN4,LAMC2,RELA,NFKB1,MUC2,NOS2	actinin, alpha 4,laminin, gamma 2,v-rel reticuloendotheliosis viral oncogene homolog A (avian),nuclear factor of kappa light polypeptide gene enhancer in B-cells 1,mucin 2, oligomeric mucus/gel-forming,nitric oxide synthase 2, inducible
path:hsa04115	5	63	42	6116	0.000144031	0.00360076	p53 signaling pathway - Homo sapiens (human)	472,4193,581,2810,3732	ATM,MDM2,BAX,SFN,CD82	ataxia telangiectasia mutated,Mdm2, p53 E3 ubiquitin protein ligase homolog (mouse),BCL2-associated X protein,stratifin,CD82 molecule
path:hsa04520	5	68	42	6111	0.000201776	0.0037833	Adherens junction - Homo sapiens (human)	999,5770,81,5595,7525	CDH1,PTPN1,ACTN4,MAPK3,YES1	cadherin 1, type 1, E-cadherin (epithelial),protein tyrosine phosphatase, non-receptor type 1,actinin, alpha 4,mitogen-activated protein kinase 3,v-yes-1 Yamaguchi sarcoma viral oncogene homolog 1
path:hsa05219	4	38	43	6141	0.000258659	0.00387989	Bladder cancer - Homo sapiens (human)	999,4313,5595,4193	CDH1,MMP2,MAPK3,MDM2	cadherin 1, type 1, E-cadherin (epithelial),matrix metallopeptidase 2 (gelatinase A, 72kDa gelatinase, 72kDa type IV collagenase),mitogen-activated protein kinase 3,Mdm2, p53 E3 ubiquitin protein ligase homolog (mouse)
path:hsa05222	5	82	42	6097	0.00045876	0.00495148	Small cell lung cancer - Homo sapiens (human)	5970,3918,4790,4843,2272	RELA,LAMC2,NFKB1,NOS2,FHIT	v-rel reticuloendotheliosis viral oncogene homolog A (avian),laminin, gamma 2,nuclear factor of kappa light polypeptide gene enhancer in B-cells 1,nitric oxide synthase 2, inducible,fragile histidine triad
path:hsa05145	6	128	41	6051	0.000462138	0.00495148	Toxoplasmosis - Homo sapiens (human)	5595,6774,3918,5970,4790,4843	MAPK3,STAT3,LAMC2,RELA,NFKB1,NOS2	mitogen-activated protein kinase 3,signal transducer and activator of transcription 3 (acute-phase response factor),laminin, gamma 2,v-rel reticuloendotheliosis viral oncogene homolog A (avian),nuclear factor of kappa light polypeptide gene enhancer in B-cells 1,nitric oxide synthase 2, inducible
path:hsa05166	8	255	39	5924	0.000682897	0.00640216	HTLV-I infection - Homo sapiens (human)	581,2114,3106,472,811,5970,4790,7477	BAX,ETS2,HLA-B,ATM,CALR,RELA,NFKB1,WNT7B	BCL2-associated X protein,v-ets erythroblastosis virus E26 oncogene homolog 2 (avian),major histocompatibility complex, class I, B,ataxia telangiectasia mutated,calreticulin,v-rel reticuloendotheliosis viral oncogene homolog A (avian),nuclear factor of kappa light polypeptide gene enhancer in B-cells 1,wingless-type MMTV integration site family, member 7B
path:hsa05221	4	53	43	6126	0.000840326	0.00700271	Acute myeloid leukemia - Homo sapiens (human)	6774,5595,5970,4790	STAT3,MAPK3,RELA,NFKB1	signal transducer and activator of transcription 3 (acute-phase response factor),mitogen-activated protein kinase 3,v-rel reticuloendotheliosis viral oncogene homolog A (avian),nuclear factor of kappa light polypeptide gene enhancer in B-cells 1
path:hsa05142	5	99	42	6080	0.00103768	0.00778263	Chagas disease (American trypanosomiasis) - Homo sapiens (human)	5595,5970,4790,811,4843	MAPK3,RELA,NFKB1,CALR,NOS2	mitogen-activated protein kinase 3,v-rel reticuloendotheliosis viral oncogene homolog A (avian),nuclear factor of kappa light polypeptide gene enhancer in B-cells 1,calreticulin,nitric oxide synthase 2, inducible
CLASS C3
PATHWAY	#HIT_SET	#HIT_BG	#NOHIT_SET	#NOHIT_BG	PVALUE	FDRADJ	DESC	GENES-IN-SET-WITH-PATHWAY	GENE-SYMBOL	GENE-NAME
path:hsa05200	37	291	59	5839	2.19839e-23	2.35228e-21	Pathways in cancer - Homo sapiens (human)	2735,595,572,4609,5155,5290,332,5743,3725,7039,5728,898,7157,5925,2248,367,1017,3082,4312,5747,7046,5894,7040,7483,387,5468,4792,1027,7184,4914,1288,4292,3091,3845,2353,2064,7480	GLI1,CCND1,BAD,MYC,PDGFB,PIK3CA,BIRC5,PTGS2,JUN,TGFA,PTEN,CCNE1,TP53,RB1,FGF3,AR,CDK2,HGF,MMP1,PTK2,TGFBR1,RAF1,TGFB1,WNT9A,RHOA,PPARG,NFKBIA,CDKN1B,HSP90B1,NTRK1,COL4A6,MLH1,HIF1A,KRAS,FOS,ERBB2,WNT10B	GLI family zinc finger 1,cyclin D1,BCL2-associated agonist of cell death,v-myc myelocytomatosis viral oncogene homolog (avian),platelet-derived growth factor beta polypeptide,phosphatidylinositol-4,5-bisphosphate 3-kinase, catalytic subunit alpha,baculoviral IAP repeat containing 5,prostaglandin-endoperoxide synthase 2 (prostaglandin G/H synthase and cyclooxygenase),jun proto-oncogene,transformin…
path:hsa05215	17	72	79	6058	1.12911e-14	6.04073e-13	Prostate cancer - Homo sapiens (human)	1027,595,7157,572,5155,5728,5290,5925,898,3845,7039,5894,367,1017,2064,7184,4792	CDKN1B,CCND1,TP53,BAD,PDGFB,PTEN,PIK3CA,RB1,CCNE1,KRAS,TGFA,RAF1,AR,CDK2,ERBB2,HSP90B1,NFKBIA	cyclin-dependent kinase inhibitor 1B (p27, Kip1),cyclin D1,tumor protein p53,BCL2-associated agonist of cell death,platelet-derived growth factor beta polypeptide,phosphatase and tensin homolog,phosphatidylinositol-4,5-bisphosphate 3-kinase, catalytic subunit alpha,retinoblastoma 1,cyclin E1,v-Ki-ras2 Kirsten rat sarcoma viral oncogene homolog,transforming growth factor, alpha,v-raf-1 murine leuk…
path:hsa05210	14	48	82	6082	2.5784e-13	9.19628e-12	Colorectal cancer - Homo sapiens (human)	595,7157,572,4609,5290,4292,7046,3845,7040,387,5894,2353,332,3725	CCND1,TP53,BAD,MYC,PIK3CA,MLH1,TGFBR1,KRAS,TGFB1,RHOA,RAF1,FOS,BIRC5,JUN	cyclin D1,tumor protein p53,BCL2-associated agonist of cell death,v-myc myelocytomatosis viral oncogene homolog (avian),phosphatidylinositol-4,5-bisphosphate 3-kinase, catalytic subunit alpha,mutL homolog 1, colon cancer, nonpolyposis type 2 (E. coli),transforming growth factor, beta receptor 1,v-Ki-ras2 Kirsten rat sarcoma viral oncogene homolog,transforming growth factor, beta 1,ras homolog fam…
path:hsa05166	21	242	75	5888	2.8429e-10	7.60476e-09	HTLV-I infection - Homo sapiens (human)	595,5111,4085,7480,7157,467,5155,5290,8061,7412,5925,9232,7046,3845,4792,7483,4609,2353,1958,3725,7040	CCND1,PCNA,MAD2L1,WNT10B,TP53,ATF3,PDGFB,PIK3CA,FOSL1,VCAM1,RB1,PTTG1,TGFBR1,KRAS,NFKBIA,WNT9A,MYC,FOS,EGR1,JUN,TGFB1	cyclin D1,proliferating cell nuclear antigen,MAD2 mitotic arrest deficient-like 1 (yeast),wingless-type MMTV integration site family, member 10B,tumor protein p53,activating transcription factor 3,platelet-derived growth factor beta polypeptide,phosphatidylinositol-4,5-bisphosphate 3-kinase, catalytic subunit alpha,FOS-like antigen 1,vascular cell adhesion molecule 1,retinoblastoma 1,pituitary tu…
path:hsa04110	15	109	81	6021	4.40223e-10	8.70627e-09	Cell cycle - Homo sapiens (human)	5591,891,1027,5347,5111,4085,7157,699,5925,898,7040,4609,595,1017,9232	PRKDC,CCNB1,CDKN1B,PLK1,PCNA,MAD2L1,TP53,BUB1,RB1,CCNE1,TGFB1,MYC,CCND1,CDK2,PTTG1	protein kinase, DNA-activated, catalytic polypeptide,cyclin B1,cyclin-dependent kinase inhibitor 1B (p27, Kip1),polo-like kinase 1,proliferating cell nuclear antigen,MAD2 mitotic arrest deficient-like 1 (yeast),tumor protein p53,budding uninhibited by benzimidazoles 1 homolog (yeast),retinoblastoma 1,cyclin E1,transforming growth factor, beta 1,v-myc myelocytomatosis viral oncogene homolog (avian…
path:hsa05222	13	74	83	6056	4.88202e-10	8.70627e-09	Small cell lung cancer - Homo sapiens (human)	1027,595,7157,5747,1288,5290,5728,5925,898,5743,4609,1017,4792	CDKN1B,CCND1,TP53,PTK2,COL4A6,PIK3CA,PTEN,RB1,CCNE1,PTGS2,MYC,CDK2,NFKBIA	cyclin-dependent kinase inhibitor 1B (p27, Kip1),cyclin D1,tumor protein p53,PTK2 protein tyrosine kinase 2,collagen, type IV, alpha 6,phosphatidylinositol-4,5-bisphosphate 3-kinase, catalytic subunit alpha,phosphatase and tensin homolog,retinoblastoma 1,cyclin E1,prostaglandin-endoperoxide synthase 2 (prostaglandin G/H synthase and cyclooxygenase),v-myc myelocytomatosis viral oncogene homolog (a…
path:hsa05220	12	61	84	6069	7.60673e-10	1.16274e-08	Chronic myeloid leukemia - Homo sapiens (human)	1027,595,7157,572,5290,5925,7046,3845,7040,4609,5894,4792	CDKN1B,CCND1,TP53,BAD,PIK3CA,RB1,TGFBR1,KRAS,TGFB1,MYC,RAF1,NFKBIA	cyclin-dependent kinase inhibitor 1B (p27, Kip1),cyclin D1,tumor protein p53,BCL2-associated agonist of cell death,phosphatidylinositol-4,5-bisphosphate 3-kinase, catalytic subunit alpha,retinoblastoma 1,transforming growth factor, beta receptor 1,v-Ki-ras2 Kirsten rat sarcoma viral oncogene homolog,transforming growth factor, beta 1,v-myc myelocytomatosis viral oncogene homolog (avian),v-raf-1 m…
path:hsa05213	10	42	86	6088	4.37796e-09	5.85552e-08	Endometrial cancer - Homo sapiens (human)	5728,595,7157,572,5290,4292,3845,4609,5894,2064	PTEN,CCND1,TP53,BAD,PIK3CA,MLH1,KRAS,MYC,RAF1,ERBB2	phosphatase and tensin homolog,cyclin D1,tumor protein p53,BCL2-associated agonist of cell death,phosphatidylinositol-4,5-bisphosphate 3-kinase, catalytic subunit alpha,mutL homolog 1, colon cancer, nonpolyposis type 2 (E. coli),v-Ki-ras2 Kirsten rat sarcoma viral oncogene homolog,v-myc myelocytomatosis viral oncogene homolog (avian),v-raf-1 murine leukemia viral oncogene homolog 1,v-erb-b2 eryth…
path:hsa05212	11	59	85	6071	6.69168e-09	7.95566e-08	Pancreatic cancer - Homo sapiens (human)	595,7157,572,5290,5925,7046,5894,7040,7039,3845,2064	CCND1,TP53,BAD,PIK3CA,RB1,TGFBR1,RAF1,TGFB1,TGFA,KRAS,ERBB2	cyclin D1,tumor protein p53,BCL2-associated agonist of cell death,phosphatidylinositol-4,5-bisphosphate 3-kinase, catalytic subunit alpha,retinoblastoma 1,transforming growth factor, beta receptor 1,v-raf-1 murine leukemia viral oncogene homolog 1,transforming growth factor, beta 1,transforming growth factor, alpha,v-Ki-ras2 Kirsten rat sarcoma viral oncogene homolog,v-erb-b2 erythroblastic leuke…
path:hsa05218	11	60	85	6070	7.8189e-09	8.36622e-08	Melanoma - Homo sapiens (human)	5728,595,7157,572,5155,5290,5925,3845,5894,2248,3082	PTEN,CCND1,TP53,BAD,PDGFB,PIK3CA,RB1,KRAS,RAF1,FGF3,HGF	phosphatase and tensin homolog,cyclin D1,tumor protein p53,BCL2-associated agonist of cell death,platelet-derived growth factor beta polypeptide,phosphatidylinositol-4,5-bisphosphate 3-kinase, catalytic subunit alpha,retinoblastoma 1,v-Ki-ras2 Kirsten rat sarcoma viral oncogene homolog,v-raf-1 murine leukemia viral oncogene homolog 1,fibroblast growth factor 3,hepatocyte growth factor (hepapoieti…
path:hsa05223	9	45	87	6085	1.01194e-07	9.84338e-07	Non-small cell lung cancer - Homo sapiens (human)	595,7157,572,5290,5925,5894,7039,3845,2064	CCND1,TP53,BAD,PIK3CA,RB1,RAF1,TGFA,KRAS,ERBB2	cyclin D1,tumor protein p53,BCL2-associated agonist of cell death,phosphatidylinositol-4,5-bisphosphate 3-kinase, catalytic subunit alpha,retinoblastoma 1,v-raf-1 murine leukemia viral oncogene homolog 1,transforming growth factor, alpha,v-Ki-ras2 Kirsten rat sarcoma viral oncogene homolog,v-erb-b2 erythroblastic leukemia viral oncogene homolog 2, neuro/glioblastoma derived oncogene homolog (avia…
path:hsa05219	8	34	88	6096	1.82586e-07	1.62806e-06	Bladder cancer - Homo sapiens (human)	4312,595,7157,5925,5894,4609,3845,2064	MMP1,CCND1,TP53,RB1,RAF1,MYC,KRAS,ERBB2	matrix metallopeptidase 1 (interstitial collagenase),cyclin D1,tumor protein p53,retinoblastoma 1,v-raf-1 murine leukemia viral oncogene homolog 1,v-myc myelocytomatosis viral oncogene homolog (avian),v-Ki-ras2 Kirsten rat sarcoma viral oncogene homolog,v-erb-b2 erythroblastic leukemia viral oncogene homolog 2, neuro/glioblastoma derived oncogene homolog (avian)
path:hsa04510	15	185	81	5945	3.12739e-07	2.57408e-06	Focal adhesion - Homo sapiens (human)	5728,857,595,2324,572,5747,5155,1288,5290,60,5894,387,3725,2064,3082	PTEN,CAV1,CCND1,FLT4,BAD,PTK2,PDGFB,COL4A6,PIK3CA,ACTB,RAF1,RHOA,JUN,ERBB2,HGF	phosphatase and tensin homolog,caveolin 1, caveolae protein, 22kDa,cyclin D1,fms-related tyrosine kinase 4,BCL2-associated agonist of cell death,PTK2 protein tyrosine kinase 2,platelet-derived growth factor beta polypeptide,collagen, type IV, alpha 6,phosphatidylinositol-4,5-bisphosphate 3-kinase, catalytic subunit alpha,actin, beta,v-raf-1 murine leukemia viral oncogene homolog 1,ras homolog fam…
path:hsa05214	9	56	87	6074	5.29092e-07	4.04377e-06	Glioma - Homo sapiens (human)	5728,595,7157,5155,5290,5925,5894,7039,3845	PTEN,CCND1,TP53,PDGFB,PIK3CA,RB1,RAF1,TGFA,KRAS	phosphatase and tensin homolog,cyclin D1,tumor protein p53,platelet-derived growth factor beta polypeptide,phosphatidylinositol-4,5-bisphosphate 3-kinase, catalytic subunit alpha,retinoblastoma 1,v-raf-1 murine leukemia viral oncogene homolog 1,transforming growth factor, alpha,v-Ki-ras2 Kirsten rat sarcoma viral oncogene homolog
path:hsa04012	10	77	86	6053	7.10273e-07	5.06661e-06	ErbB signaling pathway - Homo sapiens (human)	1027,7039,572,5747,5290,3845,4609,5894,3725,2064	CDKN1B,TGFA,BAD,PTK2,PIK3CA,KRAS,MYC,RAF1,JUN,ERBB2	cyclin-dependent kinase inhibitor 1B (p27, Kip1),transforming growth factor, alpha,BCL2-associated agonist of cell death,PTK2 protein tyrosine kinase 2,phosphatidylinositol-4,5-bisphosphate 3-kinase, catalytic subunit alpha,v-Ki-ras2 Kirsten rat sarcoma viral oncogene homolog,v-myc myelocytomatosis viral oncogene homolog (avian),v-raf-1 murine leukemia viral oncogene homolog 1,jun proto-oncogene,…
path:hsa05211	9	61	87	6069	1.01026e-06	6.75614e-06	Renal cell carcinoma - Homo sapiens (human)	5155,5290,3091,3845,7040,7039,5894,3725,3082	PDGFB,PIK3CA,HIF1A,KRAS,TGFB1,TGFA,RAF1,JUN,HGF	platelet-derived growth factor beta polypeptide,phosphatidylinositol-4,5-bisphosphate 3-kinase, catalytic subunit alpha,hypoxia inducible factor 1, alpha subunit (basic helix-loop-helix transcription factor),v-Ki-ras2 Kirsten rat sarcoma viral oncogene homolog,transforming growth factor, beta 1,transforming growth factor, alpha,v-raf-1 murine leukemia viral oncogene homolog 1,jun proto-oncogene,h…
path:hsa05216	6	23	90	6107	4.09689e-06	2.57863e-05	Thyroid cancer - Homo sapiens (human)	595,7157,4914,3845,4609,5468	CCND1,TP53,NTRK1,KRAS,MYC,PPARG	cyclin D1,tumor protein p53,neurotrophic tyrosine kinase, receptor, type 1,v-Ki-ras2 Kirsten rat sarcoma viral oncogene homolog,v-myc myelocytomatosis viral oncogene homolog (avian),peroxisome proliferator-activated receptor gamma
path:hsa04310	11	140	85	5990	1.77797e-05	0.00010569	Wnt signaling pathway - Homo sapiens (human)	6424,595,6422,6423,7157,387,8061,7480,7483,4609,3725	SFRP4,CCND1,SFRP1,SFRP2,TP53,RHOA,FOSL1,WNT10B,WNT9A,MYC,JUN	secreted frizzled-related protein 4,cyclin D1,secreted frizzled-related protein 1,secreted frizzled-related protein 2,tumor protein p53,ras homolog family member A,FOS-like antigen 1,wingless-type MMTV integration site family, member 10B,wingless-type MMTV integration site family, member 9A,v-myc myelocytomatosis viral oncogene homolog (avian),jun proto-oncogene
path:hsa04380	10	118	86	6012	2.39336e-05	0.000134784	Osteoclast differentiation - Homo sapiens (human)	5290,8061,7046,3725,7040,2353,8651,5468,9021,4792	PIK3CA,FOSL1,TGFBR1,JUN,TGFB1,FOS,SOCS1,PPARG,SOCS3,NFKBIA	phosphatidylinositol-4,5-bisphosphate 3-kinase, catalytic subunit alpha,FOS-like antigen 1,transforming growth factor, beta receptor 1,jun proto-oncogene,transforming growth factor, beta 1,FBJ murine osteosarcoma viral oncogene homolog,suppressor of cytokine signaling 1,peroxisome proliferator-activated receptor gamma,suppressor of cytokine signaling 3,nuclear factor of kappa light polypeptide ge…
path:hsa04914	8	78	88	6052	4.70647e-05	0.000251796	Progesterone-mediated oocyte maturation - Homo sapiens (human)	891,5347,4085,699,5290,5894,3845,1017	CCNB1,PLK1,MAD2L1,BUB1,PIK3CA,RAF1,KRAS,CDK2	cyclin B1,polo-like kinase 1,MAD2 mitotic arrest deficient-like 1 (yeast),budding uninhibited by benzimidazoles 1 homolog (yeast),phosphatidylinositol-4,5-bisphosphate 3-kinase, catalytic subunit alpha,v-raf-1 murine leukemia viral oncogene homolog 1,v-Ki-ras2 Kirsten rat sarcoma viral oncogene homolog,cyclin-dependent kinase 2
path:hsa04115	7	61	89	6069	7.48302e-05	0.000381278	p53 signaling pathway - Homo sapiens (human)	891,5728,595,7157,3486,898,1017	CCNB1,PTEN,CCND1,TP53,IGFBP3,CCNE1,CDK2	cyclin B1,phosphatase and tensin homolog,cyclin D1,tumor protein p53,insulin-like growth factor binding protein 3,cyclin E1,cyclin-dependent kinase 2
path:hsa04722	9	118	87	6012	0.000133663	0.000650089	Neurotrophin signaling pathway - Homo sapiens (human)	7157,572,4914,5290,3845,387,5894,3725,4792	TP53,BAD,NTRK1,PIK3CA,KRAS,RHOA,RAF1,JUN,NFKBIA	tumor protein p53,BCL2-associated agonist of cell death,neurotrophic tyrosine kinase, receptor, type 1,phosphatidylinositol-4,5-bisphosphate 3-kinase, catalytic subunit alpha,v-Ki-ras2 Kirsten rat sarcoma viral oncogene homolog,ras homolog family member A,v-raf-1 murine leukemia viral oncogene homolog 1,jun proto-oncogene,nuclear factor of kappa light polypeptide gene enhancer in B-cells inhibito…
path:hsa04370	7	69	89	6061	0.000152644	0.000710128	VEGF signaling pathway - Homo sapiens (human)	572,5290,5743,3845,5747,5894,3315	BAD,PIK3CA,PTGS2,KRAS,PTK2,RAF1,HSPB1	BCL2-associated agonist of cell death,phosphatidylinositol-4,5-bisphosphate 3-kinase, catalytic subunit alpha,prostaglandin-endoperoxide synthase 2 (prostaglandin G/H synthase and cyclooxygenase),v-Ki-ras2 Kirsten rat sarcoma viral oncogene homolog,PTK2 protein tyrosine kinase 2,v-raf-1 murine leukemia viral oncogene homolog 1,heat shock 27kDa protein 1
path:hsa05160	9	125	87	6005	0.000201341	0.000892581	Hepatitis C - Homo sapiens (human)	9641,7157,572,5290,3845,3659,5894,9021,4792	IKBKE,TP53,BAD,PIK3CA,KRAS,IRF1,RAF1,SOCS3,NFKBIA	inhibitor of kappa light polypeptide gene enhancer in B-cells, kinase epsilon,tumor protein p53,BCL2-associated agonist of cell death,phosphatidylinositol-4,5-bisphosphate 3-kinase, catalytic subunit alpha,v-Ki-ras2 Kirsten rat sarcoma viral oncogene homolog,interferon regulatory factor 1,v-raf-1 murine leukemia viral oncogene homolog 1,suppressor of cytokine signaling 3,nuclear factor of kappa l…
path:hsa04010	13	255	83	5875	0.000213037	0.000892581	MAPK signaling pathway - Homo sapiens (human)	3925,7157,4914,4609,5155,7046,3845,7040,3725,5894,2353,3315,2248	STMN1,TP53,NTRK1,MYC,PDGFB,TGFBR1,KRAS,TGFB1,JUN,RAF1,FOS,HSPB1,FGF3	stathmin 1,tumor protein p53,neurotrophic tyrosine kinase, receptor, type 1,v-myc myelocytomatosis viral oncogene homolog (avian),platelet-derived growth factor beta polypeptide,transforming growth factor, beta receptor 1,v-Ki-ras2 Kirsten rat sarcoma viral oncogene homolog,transforming growth factor, beta 1,jun proto-oncogene,v-raf-1 murine leukemia viral oncogene homolog 1,FBJ murine osteosarco…
path:hsa05221	6	51	90	6079	0.000221059	0.000892581	Acute myeloid leukemia - Homo sapiens (human)	595,572,5290,5894,4609,3845	CCND1,BAD,PIK3CA,RAF1,MYC,KRAS	cyclin D1,BCL2-associated agonist of cell death,phosphatidylinositol-4,5-bisphosphate 3-kinase, catalytic subunit alpha,v-raf-1 murine leukemia viral oncogene homolog 1,v-myc myelocytomatosis viral oncogene homolog (avian),v-Ki-ras2 Kirsten rat sarcoma viral oncogene homolog
path:hsa05162	9	127	87	6003	0.000225231	0.000892581	Measles - Homo sapiens (human)	1027,595,7157,8743,5290,898,1017,9641,4792	CDKN1B,CCND1,TP53,TNFSF10,PIK3CA,CCNE1,CDK2,IKBKE,NFKBIA	cyclin-dependent kinase inhibitor 1B (p27, Kip1),cyclin D1,tumor protein p53,tumor necrosis factor (ligand) superfamily, member 10,phosphatidylinositol-4,5-bisphosphate 3-kinase, catalytic subunit alpha,cyclin E1,cyclin-dependent kinase 2,inhibitor of kappa light polypeptide gene enhancer in B-cells, kinase epsilon,nuclear factor of kappa light polypeptide gene enhancer in B-cells inhibitor, alpha
path:hsa04114	8	104	88	6026	0.000303789	0.00116091	Oocyte meiosis - Homo sapiens (human)	891,5347,4085,898,699,367,1017,9232	CCNB1,PLK1,MAD2L1,CCNE1,BUB1,AR,CDK2,PTTG1	cyclin B1,polo-like kinase 1,MAD2 mitotic arrest deficient-like 1 (yeast),cyclin E1,budding uninhibited by benzimidazoles 1 homolog (yeast),androgen receptor,cyclin-dependent kinase 2,pituitary tumor-transforming 1
path:hsa05164	10	164	86	5966	0.000316906	0.00116927	Influenza A - Homo sapiens (human)	6352,8743,3838,5290,9641,60,5894,3725,9021,4792	CCL5,TNFSF10,KPNA2,PIK3CA,IKBKE,ACTB,RAF1,JUN,SOCS3,NFKBIA	chemokine (C-C motif) ligand 5,tumor necrosis factor (ligand) superfamily, member 10,karyopherin alpha 2 (RAG cohort 1, importin alpha 1),phosphatidylinositol-4,5-bisphosphate 3-kinase, catalytic subunit alpha,inhibitor of kappa light polypeptide gene enhancer in B-cells, kinase epsilon,actin, beta,v-raf-1 murine leukemia viral oncogene homolog 1,jun proto-oncogene,suppressor of cytokine signalin…
path:hsa05100	6	64	90	6066	0.000680016	0.00242539	Bacterial invasion of epithelial cells - Homo sapiens (human)	857,387,5290,60,5747,2017	CAV1,RHOA,PIK3CA,ACTB,PTK2,CTTN	caveolin 1, caveolae protein, 22kDa,ras homolog family member A,phosphatidylinositol-4,5-bisphosphate 3-kinase, catalytic subunit alpha,actin, beta,PTK2 protein tyrosine kinase 2,cortactin
path:hsa05142	7	97	89	6033	0.00104482	0.00355928	Chagas disease (American trypanosomiasis) - Homo sapiens (human)	6352,5290,7046,7040,3725,2353,4792	CCL5,PIK3CA,TGFBR1,TGFB1,JUN,FOS,NFKBIA	chemokine (C-C motif) ligand 5,phosphatidylinositol-4,5-bisphosphate 3-kinase, catalytic subunit alpha,transforming growth factor, beta receptor 1,transforming growth factor, beta 1,jun proto-oncogene,FBJ murine osteosarcoma viral oncogene homolog,nuclear factor of kappa light polypeptide gene enhancer in B-cells inhibitor, alpha
path:hsa05169	10	193	86	5937	0.00106446	0.00355928	Epstein-Barr virus infection - Homo sapiens (human)	1027,960,7157,5290,5925,4609,3725,1017,3315,4792	CDKN1B,CD44,TP53,PIK3CA,RB1,MYC,JUN,CDK2,HSPB1,NFKBIA	cyclin-dependent kinase inhibitor 1B (p27, Kip1),CD44 molecule (Indian blood group),tumor protein p53,phosphatidylinositol-4,5-bisphosphate 3-kinase, catalytic subunit alpha,retinoblastoma 1,v-myc myelocytomatosis viral oncogene homolog (avian),jun proto-oncogene,cyclin-dependent kinase 2,heat shock 27kDa protein 1,nuclear factor of kappa light polypeptide gene enhancer in B-cells inhibitor, alpha
path:hsa04662	6	72	90	6058	0.00120677	0.00391285	B cell receptor signaling pathway - Homo sapiens (human)	5290,3845,5894,3725,2353,4792	PIK3CA,KRAS,RAF1,JUN,FOS,NFKBIA	phosphatidylinositol-4,5-bisphosphate 3-kinase, catalytic subunit alpha,v-Ki-ras2 Kirsten rat sarcoma viral oncogene homolog,v-raf-1 murine leukemia viral oncogene homolog 1,jun proto-oncogene,FBJ murine osteosarcoma viral oncogene homolog,nuclear factor of kappa light polypeptide gene enhancer in B-cells inhibitor, alpha
path:hsa04660	7	101	89	6029	0.00130456	0.00410552	T cell receptor signaling pathway - Homo sapiens (human)	3725,5290,3845,387,5894,2353,4792	JUN,PIK3CA,KRAS,RHOA,RAF1,FOS,NFKBIA	jun proto-oncogene,phosphatidylinositol-4,5-bisphosphate 3-kinase, catalytic subunit alpha,v-Ki-ras2 Kirsten rat sarcoma viral oncogene homolog,ras homolog family member A,v-raf-1 murine leukemia viral oncogene homolog 1,FBJ murine osteosarcoma viral oncogene homolog,nuclear factor of kappa light polypeptide gene enhancer in B-cells inhibitor, alpha
path:hsa05202	9	171	87	5959	0.00172007	0.0052585	Transcriptional misregulation in cancer - Homo sapiens (human)	3206,1027,7157,4914,5747,5155,3486,4609,5468	HOXA10,CDKN1B,TP53,NTRK1,PTK2,PDGFB,IGFBP3,MYC,PPARG	homeobox A10,cyclin-dependent kinase inhibitor 1B (p27, Kip1),tumor protein p53,neurotrophic tyrosine kinase, receptor, type 1,PTK2 protein tyrosine kinase 2,platelet-derived growth factor beta polypeptide,insulin-like growth factor binding protein 3,v-myc myelocytomatosis viral oncogene homolog (avian),peroxisome proliferator-activated receptor gamma
path:hsa05168	9	173	87	5957	0.00185669	0.00551849	Herpes simplex infection - Homo sapiens (human)	6352,7157,9641,1936,3725,2353,1017,9021,4792	CCL5,TP53,IKBKE,EEF1D,JUN,FOS,CDK2,SOCS3,NFKBIA	chemokine (C-C motif) ligand 5,tumor protein p53,inhibitor of kappa light polypeptide gene enhancer in B-cells, kinase epsilon,eukaryotic translation elongation factor 1 delta (guanine nucleotide exchange protein),jun proto-oncogene,FBJ murine osteosarcoma viral oncogene homolog,cyclin-dependent kinase 2,suppressor of cytokine signaling 3,nuclear factor of kappa light polypeptide gene enhancer in…
path:hsa04210	6	81	90	6049	0.00212326	0.00614025	Apoptosis - Homo sapiens (human)	7157,572,4914,8743,5290,4792	TP53,BAD,NTRK1,TNFSF10,PIK3CA,NFKBIA	tumor protein p53,BCL2-associated agonist of cell death,neurotrophic tyrosine kinase, receptor, type 1,tumor necrosis factor (ligand) superfamily, member 10,phosphatidylinositol-4,5-bisphosphate 3-kinase, catalytic subunit alpha,nuclear factor of kappa light polypeptide gene enhancer in B-cells inhibitor, alpha
CLASS C4
PATHWAY	#HIT_SET	#HIT_BG	#NOHIT_SET	#NOHIT_BG	PVALUE	FDRADJ	DESC	GENES-IN-SET-WITH-PATHWAY	GENE-SYMBOL	GENE-NAME
path:hsa05200	15	313	58	5840	4.33629e-06	0.000388414	Pathways in cancer - Homo sapiens (human)	1287,5594,4318,1029,284217,3576,1612,5291,355,3065,4089,1030,2113,2260,7482	COL4A5,MAPK1,MMP9,CDKN2A,LAMA1,IL8,DAPK1,PIK3CB,FAS,HDAC1,SMAD4,CDKN2B,ETS1,FGFR1,WNT2B	collagen, type IV, alpha 5,mitogen-activated protein kinase 1,matrix metallopeptidase 9 (gelatinase B, 92kDa gelatinase, 92kDa type IV collagenase),cyclin-dependent kinase inhibitor 2A,laminin, alpha 1,interleukin 8,death-associated protein kinase 1,phosphatidylinositol-4,5-bisphosphate 3-kinase, catalytic subunit beta,Fas (TNF receptor superfamily, member 6),histone deacetylase 1,SMAD family mem…
path:hsa05219	6	36	67	6117	7.92682e-06	0.000388414	Bladder cancer - Homo sapiens (human)	5594,4318,1029,3576,1612,1890	MAPK1,MMP9,CDKN2A,IL8,DAPK1,TYMP	mitogen-activated protein kinase 1,matrix metallopeptidase 9 (gelatinase B, 92kDa gelatinase, 92kDa type IV collagenase),cyclin-dependent kinase inhibitor 2A,interleukin 8,death-associated protein kinase 1,thymidine phosphorylase

## Sheet: C2
PATHWAY	#HIT_SET	#HIT_BG	#NOHIT_SET	#NOHIT_BG	PVALUE	FDRADJ	DESC	GENES-IN-SET-WITH-PATHWAY	GENE-SYMBOL	GENE-NAME
path:hsa05200	13	315	34	5864	5.2493e-07	3.93698e-05	Pathways in cancer - Homo sapiens (human)	4313,5595,581,6774,7428,999,4193,3918,4436,7477,5970,4790,4843	MMP2,MAPK3,BAX,STAT3,VHL,CDH1,MDM2,LAMC2,MSH2,WNT7B,RELA,NFKB1,NOS2	matrix metallopeptidase 2 (gelatinase A, 72kDa gelatinase, 72kDa type IV collagenase),mitogen-activated protein kinase 3,BCL2-associated X protein,signal transducer and activator of transcription 3 (acute-phase response factor),von Hippel-Lindau tumor suppressor, E3 ubiquitin protein ligase,cadherin 1, type 1, E-cadherin (epithelial),Mdm2, p53 E3 ubiquitin protein ligase homolog (mouse),laminin, …
path:hsa05146	6	102	41	6077	0.000142782	0.00360076	Amoebiasis - Homo sapiens (human)	81,3918,5970,4790,4583,4843	ACTN4,LAMC2,RELA,NFKB1,MUC2,NOS2	actinin, alpha 4,laminin, gamma 2,v-rel reticuloendotheliosis viral oncogene homolog A (avian),nuclear factor of kappa light polypeptide gene enhancer in B-cells 1,mucin 2, oligomeric mucus/gel-forming,nitric oxide synthase 2, inducible
path:hsa04115	5	63	42	6116	0.000144031	0.00360076	p53 signaling pathway - Homo sapiens (human)	472,4193,581,2810,3732	ATM,MDM2,BAX,SFN,CD82	ataxia telangiectasia mutated,Mdm2, p53 E3 ubiquitin protein ligase homolog (mouse),BCL2-associated X protein,stratifin,CD82 molecule
path:hsa04520	5	68	42	6111	0.000201776	0.0037833	Adherens junction - Homo sapiens (human)	999,5770,81,5595,7525	CDH1,PTPN1,ACTN4,MAPK3,YES1	cadherin 1, type 1, E-cadherin (epithelial),protein tyrosine phosphatase, non-receptor type 1,actinin, alpha 4,mitogen-activated protein kinase 3,v-yes-1 Yamaguchi sarcoma viral oncogene homolog 1
path:hsa05219	4	38	43	6141	0.000258659	0.00387989	Bladder cancer - Homo sapiens (human)	999,4313,5595,4193	CDH1,MMP2,MAPK3,MDM2	cadherin 1, type 1, E-cadherin (epithelial),matrix metallopeptidase 2 (gelatinase A, 72kDa gelatinase, 72kDa type IV collagenase),mitogen-activated protein kinase 3,Mdm2, p53 E3 ubiquitin protein ligase homolog (mouse)
path:hsa05222	5	82	42	6097	0.00045876	0.00495148	Small cell lung cancer - Homo sapiens (human)	5970,3918,4790,4843,2272	RELA,LAMC2,NFKB1,NOS2,FHIT	v-rel reticuloendotheliosis viral oncogene homolog A (avian),laminin, gamma 2,nuclear factor of kappa light polypeptide gene enhancer in B-cells 1,nitric oxide synthase 2, inducible,fragile histidine triad
path:hsa05145	6	128	41	6051	0.000462138	0.00495148	Toxoplasmosis - Homo sapiens (human)	5595,6774,3918,5970,4790,4843	MAPK3,STAT3,LAMC2,RELA,NFKB1,NOS2	mitogen-activated protein kinase 3,signal transducer and activator of transcription 3 (acute-phase response factor),laminin, gamma 2,v-rel reticuloendotheliosis viral oncogene homolog A (avian),nuclear factor of kappa light polypeptide gene enhancer in B-cells 1,nitric oxide synthase 2, inducible
path:hsa05166	8	255	39	5924	0.000682897	0.00640216	HTLV-I infection - Homo sapiens (human)	581,2114,3106,472,811,5970,4790,7477	BAX,ETS2,HLA-B,ATM,CALR,RELA,NFKB1,WNT7B	BCL2-associated X protein,v-ets erythroblastosis virus E26 oncogene homolog 2 (avian),major histocompatibility complex, class I, B,ataxia telangiectasia mutated,calreticulin,v-rel reticuloendotheliosis viral oncogene homolog A (avian),nuclear factor of kappa light polypeptide gene enhancer in B-cells 1,wingless-type MMTV integration site family, member 7B
path:hsa05221	4	53	43	6126	0.000840326	0.00700271	Acute myeloid leukemia - Homo sapiens (human)	6774,5595,5970,4790	STAT3,MAPK3,RELA,NFKB1	signal transducer and activator of transcription 3 (acute-phase response factor),mitogen-activated protein kinase 3,v-rel reticuloendotheliosis viral oncogene homolog A (avian),nuclear factor of kappa light polypeptide gene enhancer in B-cells 1
path:hsa05142	5	99	42	6080	0.00103768	0.00778263	Chagas disease (American trypanosomiasis) - Homo sapiens (human)	5595,5970,4790,811,4843	MAPK3,RELA,NFKB1,CALR,NOS2	mitogen-activated protein kinase 3,v-rel reticuloendotheliosis viral oncogene homolog A (avian),nuclear factor of kappa light polypeptide gene enhancer in B-cells 1,calreticulin,nitric oxide synthase 2, inducible

## Sheet: C3
PATHWAY	#HIT_SET	#HIT_BG	#NOHIT_SET	#NOHIT_BG	PVALUE	FDRADJ	DESC	GENES-IN-SET-WITH-PATHWAY	GENE-SYMBOL	GENE-NAME
path:hsa05200	37	291	59	5839	2.19839e-23	2.35228e-21	Pathways in cancer - Homo sapiens (human)	2735,595,572,4609,5155,5290,332,5743,3725,7039,5728,898,7157,5925,2248,367,1017,3082,4312,5747,7046,5894,7040,7483,387,5468,4792,1027,7184,4914,1288,4292,3091,3845,2353,2064,7480	GLI1,CCND1,BAD,MYC,PDGFB,PIK3CA,BIRC5,PTGS2,JUN,TGFA,PTEN,CCNE1,TP53,RB1,FGF3,AR,CDK2,HGF,MMP1,PTK2,TGFBR1,RAF1,TGFB1,WNT9A,RHOA,PPARG,NFKBIA,CDKN1B,HSP90B1,NTRK1,COL4A6,MLH1,HIF1A,KRAS,FOS,ERBB2,WNT10B	GLI family zinc finger 1,cyclin D1,BCL2-associated agonist of cell death,v-myc myelocytomatosis viral oncogene homolog (avian),platelet-derived growth factor beta polypeptide,phosphatidylinositol-4,5-bisphosphate 3-kinase, catalytic subunit alpha,baculoviral IAP repeat containing 5,prostaglandin-endoperoxide synthase 2 (prostaglandin G/H synthase and cyclooxygenase),jun proto-oncogene,transformin…
path:hsa05215	17	72	79	6058	1.12911e-14	6.04073e-13	Prostate cancer - Homo sapiens (human)	1027,595,7157,572,5155,5728,5290,5925,898,3845,7039,5894,367,1017,2064,7184,4792	CDKN1B,CCND1,TP53,BAD,PDGFB,PTEN,PIK3CA,RB1,CCNE1,KRAS,TGFA,RAF1,AR,CDK2,ERBB2,HSP90B1,NFKBIA	cyclin-dependent kinase inhibitor 1B (p27, Kip1),cyclin D1,tumor protein p53,BCL2-associated agonist of cell death,platelet-derived growth factor beta polypeptide,phosphatase and tensin homolog,phosphatidylinositol-4,5-bisphosphate 3-kinase, catalytic subunit alpha,retinoblastoma 1,cyclin E1,v-Ki-ras2 Kirsten rat sarcoma viral oncogene homolog,transforming growth factor, alpha,v-raf-1 murine leuk…
path:hsa05210	14	48	82	6082	2.5784e-13	9.19628e-12	Colorectal cancer - Homo sapiens (human)	595,7157,572,4609,5290,4292,7046,3845,7040,387,5894,2353,332,3725	CCND1,TP53,BAD,MYC,PIK3CA,MLH1,TGFBR1,KRAS,TGFB1,RHOA,RAF1,FOS,BIRC5,JUN	cyclin D1,tumor protein p53,BCL2-associated agonist of cell death,v-myc myelocytomatosis viral oncogene homolog (avian),phosphatidylinositol-4,5-bisphosphate 3-kinase, catalytic subunit alpha,mutL homolog 1, colon cancer, nonpolyposis type 2 (E. coli),transforming growth factor, beta receptor 1,v-Ki-ras2 Kirsten rat sarcoma viral oncogene homolog,transforming growth factor, beta 1,ras homolog fam…
path:hsa05166	21	242	75	5888	2.8429e-10	7.60476e-09	HTLV-I infection - Homo sapiens (human)	595,5111,4085,7480,7157,467,5155,5290,8061,7412,5925,9232,7046,3845,4792,7483,4609,2353,1958,3725,7040	CCND1,PCNA,MAD2L1,WNT10B,TP53,ATF3,PDGFB,PIK3CA,FOSL1,VCAM1,RB1,PTTG1,TGFBR1,KRAS,NFKBIA,WNT9A,MYC,FOS,EGR1,JUN,TGFB1	cyclin D1,proliferating cell nuclear antigen,MAD2 mitotic arrest deficient-like 1 (yeast),wingless-type MMTV integration site family, member 10B,tumor protein p53,activating transcription factor 3,platelet-derived growth factor beta polypeptide,phosphatidylinositol-4,5-bisphosphate 3-kinase, catalytic subunit alpha,FOS-like antigen 1,vascular cell adhesion molecule 1,retinoblastoma 1,pituitary tu…
path:hsa04110	15	109	81	6021	4.40223e-10	8.70627e-09	Cell cycle - Homo sapiens (human)	5591,891,1027,5347,5111,4085,7157,699,5925,898,7040,4609,595,1017,9232	PRKDC,CCNB1,CDKN1B,PLK1,PCNA,MAD2L1,TP53,BUB1,RB1,CCNE1,TGFB1,MYC,CCND1,CDK2,PTTG1	protein kinase, DNA-activated, catalytic polypeptide,cyclin B1,cyclin-dependent kinase inhibitor 1B (p27, Kip1),polo-like kinase 1,proliferating cell nuclear antigen,MAD2 mitotic arrest deficient-like 1 (yeast),tumor protein p53,budding uninhibited by benzimidazoles 1 homolog (yeast),retinoblastoma 1,cyclin E1,transforming growth factor, beta 1,v-myc myelocytomatosis viral oncogene homolog (avian…
path:hsa05222	13	74	83	6056	4.88202e-10	8.70627e-09	Small cell lung cancer - Homo sapiens (human)	1027,595,7157,5747,1288,5290,5728,5925,898,5743,4609,1017,4792	CDKN1B,CCND1,TP53,PTK2,COL4A6,PIK3CA,PTEN,RB1,CCNE1,PTGS2,MYC,CDK2,NFKBIA	cyclin-dependent kinase inhibitor 1B (p27, Kip1),cyclin D1,tumor protein p53,PTK2 protein tyrosine kinase 2,collagen, type IV, alpha 6,phosphatidylinositol-4,5-bisphosphate 3-kinase, catalytic subunit alpha,phosphatase and tensin homolog,retinoblastoma 1,cyclin E1,prostaglandin-endoperoxide synthase 2 (prostaglandin G/H synthase and cyclooxygenase),v-myc myelocytomatosis viral oncogene homolog (a…
path:hsa05220	12	61	84	6069	7.60673e-10	1.16274e-08	Chronic myeloid leukemia - Homo sapiens (human)	1027,595,7157,572,5290,5925,7046,3845,7040,4609,5894,4792	CDKN1B,CCND1,TP53,BAD,PIK3CA,RB1,TGFBR1,KRAS,TGFB1,MYC,RAF1,NFKBIA	cyclin-dependent kinase inhibitor 1B (p27, Kip1),cyclin D1,tumor protein p53,BCL2-associated agonist of cell death,phosphatidylinositol-4,5-bisphosphate 3-kinase, catalytic subunit alpha,retinoblastoma 1,transforming growth factor, beta receptor 1,v-Ki-ras2 Kirsten rat sarcoma viral oncogene homolog,transforming growth factor, beta 1,v-myc myelocytomatosis viral oncogene homolog (avian),v-raf-1 m…
path:hsa05213	10	42	86	6088	4.37796e-09	5.85552e-08	Endometrial cancer - Homo sapiens (human)	5728,595,7157,572,5290,4292,3845,4609,5894,2064	PTEN,CCND1,TP53,BAD,PIK3CA,MLH1,KRAS,MYC,RAF1,ERBB2	phosphatase and tensin homolog,cyclin D1,tumor protein p53,BCL2-associated agonist of cell death,phosphatidylinositol-4,5-bisphosphate 3-kinase, catalytic subunit alpha,mutL homolog 1, colon cancer, nonpolyposis type 2 (E. coli),v-Ki-ras2 Kirsten rat sarcoma viral oncogene homolog,v-myc myelocytomatosis viral oncogene homolog (avian),v-raf-1 murine leukemia viral oncogene homolog 1,v-erb-b2 eryth…
path:hsa05212	11	59	85	6071	6.69168e-09	7.95566e-08	Pancreatic cancer - Homo sapiens (human)	595,7157,572,5290,5925,7046,5894,7040,7039,3845,2064	CCND1,TP53,BAD,PIK3CA,RB1,TGFBR1,RAF1,TGFB1,TGFA,KRAS,ERBB2	cyclin D1,tumor protein p53,BCL2-associated agonist of cell death,phosphatidylinositol-4,5-bisphosphate 3-kinase, catalytic subunit alpha,retinoblastoma 1,transforming growth factor, beta receptor 1,v-raf-1 murine leukemia viral oncogene homolog 1,transforming growth factor, beta 1,transforming growth factor, alpha,v-Ki-ras2 Kirsten rat sarcoma viral oncogene homolog,v-erb-b2 erythroblastic leuke…
path:hsa05218	11	60	85	6070	7.8189e-09	8.36622e-08	Melanoma - Homo sapiens (human)	5728,595,7157,572,5155,5290,5925,3845,5894,2248,3082	PTEN,CCND1,TP53,BAD,PDGFB,PIK3CA,RB1,KRAS,RAF1,FGF3,HGF	phosphatase and tensin homolog,cyclin D1,tumor protein p53,BCL2-associated agonist of cell death,platelet-derived growth factor beta polypeptide,phosphatidylinositol-4,5-bisphosphate 3-kinase, catalytic subunit alpha,retinoblastoma 1,v-Ki-ras2 Kirsten rat sarcoma viral oncogene homolog,v-raf-1 murine leukemia viral oncogene homolog 1,fibroblast growth factor 3,hepatocyte growth factor (hepapoieti…
path:hsa05223	9	45	87	6085	1.01194e-07	9.84338e-07	Non-small cell lung cancer - Homo sapiens (human)	595,7157,572,5290,5925,5894,7039,3845,2064	CCND1,TP53,BAD,PIK3CA,RB1,RAF1,TGFA,KRAS,ERBB2	cyclin D1,tumor protein p53,BCL2-associated agonist of cell death,phosphatidylinositol-4,5-bisphosphate 3-kinase, catalytic subunit alpha,retinoblastoma 1,v-raf-1 murine leukemia viral oncogene homolog 1,transforming growth factor, alpha,v-Ki-ras2 Kirsten rat sarcoma viral oncogene homolog,v-erb-b2 erythroblastic leukemia viral oncogene homolog 2, neuro/glioblastoma derived oncogene homolog (avia…
path:hsa05219	8	34	88	6096	1.82586e-07	1.62806e-06	Bladder cancer - Homo sapiens (human)	4312,595,7157,5925,5894,4609,3845,2064	MMP1,CCND1,TP53,RB1,RAF1,MYC,KRAS,ERBB2	matrix metallopeptidase 1 (interstitial collagenase),cyclin D1,tumor protein p53,retinoblastoma 1,v-raf-1 murine leukemia viral oncogene homolog 1,v-myc myelocytomatosis viral oncogene homolog (avian),v-Ki-ras2 Kirsten rat sarcoma viral oncogene homolog,v-erb-b2 erythroblastic leukemia viral oncogene homolog 2, neuro/glioblastoma derived oncogene homolog (avian)
path:hsa04510	15	185	81	5945	3.12739e-07	2.57408e-06	Focal adhesion - Homo sapiens (human)	5728,857,595,2324,572,5747,5155,1288,5290,60,5894,387,3725,2064,3082	PTEN,CAV1,CCND1,FLT4,BAD,PTK2,PDGFB,COL4A6,PIK3CA,ACTB,RAF1,RHOA,JUN,ERBB2,HGF	phosphatase and tensin homolog,caveolin 1, caveolae protein, 22kDa,cyclin D1,fms-related tyrosine kinase 4,BCL2-associated agonist of cell death,PTK2 protein tyrosine kinase 2,platelet-derived growth factor beta polypeptide,collagen, type IV, alpha 6,phosphatidylinositol-4,5-bisphosphate 3-kinase, catalytic subunit alpha,actin, beta,v-raf-1 murine leukemia viral oncogene homolog 1,ras homolog fam…
path:hsa05214	9	56	87	6074	5.29092e-07	4.04377e-06	Glioma - Homo sapiens (human)	5728,595,7157,5155,5290,5925,5894,7039,3845	PTEN,CCND1,TP53,PDGFB,PIK3CA,RB1,RAF1,TGFA,KRAS	phosphatase and tensin homolog,cyclin D1,tumor protein p53,platelet-derived growth factor beta polypeptide,phosphatidylinositol-4,5-bisphosphate 3-kinase, catalytic subunit alpha,retinoblastoma 1,v-raf-1 murine leukemia viral oncogene homolog 1,transforming growth factor, alpha,v-Ki-ras2 Kirsten rat sarcoma viral oncogene homolog
path:hsa04012	10	77	86	6053	7.10273e-07	5.06661e-06	ErbB signaling pathway - Homo sapiens (human)	1027,7039,572,5747,5290,3845,4609,5894,3725,2064	CDKN1B,TGFA,BAD,PTK2,PIK3CA,KRAS,MYC,RAF1,JUN,ERBB2	cyclin-dependent kinase inhibitor 1B (p27, Kip1),transforming growth factor, alpha,BCL2-associated agonist of cell death,PTK2 protein tyrosine kinase 2,phosphatidylinositol-4,5-bisphosphate 3-kinase, catalytic subunit alpha,v-Ki-ras2 Kirsten rat sarcoma viral oncogene homolog,v-myc myelocytomatosis viral oncogene homolog (avian),v-raf-1 murine leukemia viral oncogene homolog 1,jun proto-oncogene,…
path:hsa05211	9	61	87	6069	1.01026e-06	6.75614e-06	Renal cell carcinoma - Homo sapiens (human)	5155,5290,3091,3845,7040,7039,5894,3725,3082	PDGFB,PIK3CA,HIF1A,KRAS,TGFB1,TGFA,RAF1,JUN,HGF	platelet-derived growth factor beta polypeptide,phosphatidylinositol-4,5-bisphosphate 3-kinase, catalytic subunit alpha,hypoxia inducible factor 1, alpha subunit (basic helix-loop-helix transcription factor),v-Ki-ras2 Kirsten rat sarcoma viral oncogene homolog,transforming growth factor, beta 1,transforming growth factor, alpha,v-raf-1 murine leukemia viral oncogene homolog 1,jun proto-oncogene,h…
path:hsa05216	6	23	90	6107	4.09689e-06	2.57863e-05	Thyroid cancer - Homo sapiens (human)	595,7157,4914,3845,4609,5468	CCND1,TP53,NTRK1,KRAS,MYC,PPARG	cyclin D1,tumor protein p53,neurotrophic tyrosine kinase, receptor, type 1,v-Ki-ras2 Kirsten rat sarcoma viral oncogene homolog,v-myc myelocytomatosis viral oncogene homolog (avian),peroxisome proliferator-activated receptor gamma
path:hsa04310	11	140	85	5990	1.77797e-05	0.00010569	Wnt signaling pathway - Homo sapiens (human)	6424,595,6422,6423,7157,387,8061,7480,7483,4609,3725	SFRP4,CCND1,SFRP1,SFRP2,TP53,RHOA,FOSL1,WNT10B,WNT9A,MYC,JUN	secreted frizzled-related protein 4,cyclin D1,secreted frizzled-related protein 1,secreted frizzled-related protein 2,tumor protein p53,ras homolog family member A,FOS-like antigen 1,wingless-type MMTV integration site family, member 10B,wingless-type MMTV integration site family, member 9A,v-myc myelocytomatosis viral oncogene homolog (avian),jun proto-oncogene
path:hsa04380	10	118	86	6012	2.39336e-05	0.000134784	Osteoclast differentiation - Homo sapiens (human)	5290,8061,7046,3725,7040,2353,8651,5468,9021,4792	PIK3CA,FOSL1,TGFBR1,JUN,TGFB1,FOS,SOCS1,PPARG,SOCS3,NFKBIA	phosphatidylinositol-4,5-bisphosphate 3-kinase, catalytic subunit alpha,FOS-like antigen 1,transforming growth factor, beta receptor 1,jun proto-oncogene,transforming growth factor, beta 1,FBJ murine osteosarcoma viral oncogene homolog,suppressor of cytokine signaling 1,peroxisome proliferator-activated receptor gamma,suppressor of cytokine signaling 3,nuclear factor of kappa light polypeptide ge…
path:hsa04914	8	78	88	6052	4.70647e-05	0.000251796	Progesterone-mediated oocyte maturation - Homo sapiens (human)	891,5347,4085,699,5290,5894,3845,1017	CCNB1,PLK1,MAD2L1,BUB1,PIK3CA,RAF1,KRAS,CDK2	cyclin B1,polo-like kinase 1,MAD2 mitotic arrest deficient-like 1 (yeast),budding uninhibited by benzimidazoles 1 homolog (yeast),phosphatidylinositol-4,5-bisphosphate 3-kinase, catalytic subunit alpha,v-raf-1 murine leukemia viral oncogene homolog 1,v-Ki-ras2 Kirsten rat sarcoma viral oncogene homolog,cyclin-dependent kinase 2
path:hsa04115	7	61	89	6069	7.48302e-05	0.000381278	p53 signaling pathway - Homo sapiens (human)	891,5728,595,7157,3486,898,1017	CCNB1,PTEN,CCND1,TP53,IGFBP3,CCNE1,CDK2	cyclin B1,phosphatase and tensin homolog,cyclin D1,tumor protein p53,insulin-like growth factor binding protein 3,cyclin E1,cyclin-dependent kinase 2
path:hsa04722	9	118	87	6012	0.000133663	0.000650089	Neurotrophin signaling pathway - Homo sapiens (human)	7157,572,4914,5290,3845,387,5894,3725,4792	TP53,BAD,NTRK1,PIK3CA,KRAS,RHOA,RAF1,JUN,NFKBIA	tumor protein p53,BCL2-associated agonist of cell death,neurotrophic tyrosine kinase, receptor, type 1,phosphatidylinositol-4,5-bisphosphate 3-kinase, catalytic subunit alpha,v-Ki-ras2 Kirsten rat sarcoma viral oncogene homolog,ras homolog family member A,v-raf-1 murine leukemia viral oncogene homolog 1,jun proto-oncogene,nuclear factor of kappa light polypeptide gene enhancer in B-cells inhibito…
path:hsa04370	7	69	89	6061	0.000152644	0.000710128	VEGF signaling pathway - Homo sapiens (human)	572,5290,5743,3845,5747,5894,3315	BAD,PIK3CA,PTGS2,KRAS,PTK2,RAF1,HSPB1	BCL2-associated agonist of cell death,phosphatidylinositol-4,5-bisphosphate 3-kinase, catalytic subunit alpha,prostaglandin-endoperoxide synthase 2 (prostaglandin G/H synthase and cyclooxygenase),v-Ki-ras2 Kirsten rat sarcoma viral oncogene homolog,PTK2 protein tyrosine kinase 2,v-raf-1 murine leukemia viral oncogene homolog 1,heat shock 27kDa protein 1
path:hsa05160	9	125	87	6005	0.000201341	0.000892581	Hepatitis C - Homo sapiens (human)	9641,7157,572,5290,3845,3659,5894,9021,4792	IKBKE,TP53,BAD,PIK3CA,KRAS,IRF1,RAF1,SOCS3,NFKBIA	inhibitor of kappa light polypeptide gene enhancer in B-cells, kinase epsilon,tumor protein p53,BCL2-associated agonist of cell death,phosphatidylinositol-4,5-bisphosphate 3-kinase, catalytic subunit alpha,v-Ki-ras2 Kirsten rat sarcoma viral oncogene homolog,interferon regulatory factor 1,v-raf-1 murine leukemia viral oncogene homolog 1,suppressor of cytokine signaling 3,nuclear factor of kappa l…
path:hsa04010	13	255	83	5875	0.000213037	0.000892581	MAPK signaling pathway - Homo sapiens (human)	3925,7157,4914,4609,5155,7046,3845,7040,3725,5894,2353,3315,2248	STMN1,TP53,NTRK1,MYC,PDGFB,TGFBR1,KRAS,TGFB1,JUN,RAF1,FOS,HSPB1,FGF3	stathmin 1,tumor protein p53,neurotrophic tyrosine kinase, receptor, type 1,v-myc myelocytomatosis viral oncogene homolog (avian),platelet-derived growth factor beta polypeptide,transforming growth factor, beta receptor 1,v-Ki-ras2 Kirsten rat sarcoma viral oncogene homolog,transforming growth factor, beta 1,jun proto-oncogene,v-raf-1 murine leukemia viral oncogene homolog 1,FBJ murine osteosarco…
path:hsa05221	6	51	90	6079	0.000221059	0.000892581	Acute myeloid leukemia - Homo sapiens (human)	595,572,5290,5894,4609,3845	CCND1,BAD,PIK3CA,RAF1,MYC,KRAS	cyclin D1,BCL2-associated agonist of cell death,phosphatidylinositol-4,5-bisphosphate 3-kinase, catalytic subunit alpha,v-raf-1 murine leukemia viral oncogene homolog 1,v-myc myelocytomatosis viral oncogene homolog (avian),v-Ki-ras2 Kirsten rat sarcoma viral oncogene homolog
path:hsa05162	9	127	87	6003	0.000225231	0.000892581	Measles - Homo sapiens (human)	1027,595,7157,8743,5290,898,1017,9641,4792	CDKN1B,CCND1,TP53,TNFSF10,PIK3CA,CCNE1,CDK2,IKBKE,NFKBIA	cyclin-dependent kinase inhibitor 1B (p27, Kip1),cyclin D1,tumor protein p53,tumor necrosis factor (ligand) superfamily, member 10,phosphatidylinositol-4,5-bisphosphate 3-kinase, catalytic subunit alpha,cyclin E1,cyclin-dependent kinase 2,inhibitor of kappa light polypeptide gene enhancer in B-cells, kinase epsilon,nuclear factor of kappa light polypeptide gene enhancer in B-cells inhibitor, alpha
path:hsa04114	8	104	88	6026	0.000303789	0.00116091	Oocyte meiosis - Homo sapiens (human)	891,5347,4085,898,699,367,1017,9232	CCNB1,PLK1,MAD2L1,CCNE1,BUB1,AR,CDK2,PTTG1	cyclin B1,polo-like kinase 1,MAD2 mitotic arrest deficient-like 1 (yeast),cyclin E1,budding uninhibited by benzimidazoles 1 homolog (yeast),androgen receptor,cyclin-dependent kinase 2,pituitary tumor-transforming 1
path:hsa05164	10	164	86	5966	0.000316906	0.00116927	Influenza A - Homo sapiens (human)	6352,8743,3838,5290,9641,60,5894,3725,9021,4792	CCL5,TNFSF10,KPNA2,PIK3CA,IKBKE,ACTB,RAF1,JUN,SOCS3,NFKBIA	chemokine (C-C motif) ligand 5,tumor necrosis factor (ligand) superfamily, member 10,karyopherin alpha 2 (RAG cohort 1, importin alpha 1),phosphatidylinositol-4,5-bisphosphate 3-kinase, catalytic subunit alpha,inhibitor of kappa light polypeptide gene enhancer in B-cells, kinase epsilon,actin, beta,v-raf-1 murine leukemia viral oncogene homolog 1,jun proto-oncogene,suppressor of cytokine signalin…
path:hsa05100	6	64	90	6066	0.000680016	0.00242539	Bacterial invasion of epithelial cells - Homo sapiens (human)	857,387,5290,60,5747,2017	CAV1,RHOA,PIK3CA,ACTB,PTK2,CTTN	caveolin 1, caveolae protein, 22kDa,ras homolog family member A,phosphatidylinositol-4,5-bisphosphate 3-kinase, catalytic subunit alpha,actin, beta,PTK2 protein tyrosine kinase 2,cortactin
path:hsa05142	7	97	89	6033	0.00104482	0.00355928	Chagas disease (American trypanosomiasis) - Homo sapiens (human)	6352,5290,7046,7040,3725,2353,4792	CCL5,PIK3CA,TGFBR1,TGFB1,JUN,FOS,NFKBIA	chemokine (C-C motif) ligand 5,phosphatidylinositol-4,5-bisphosphate 3-kinase, catalytic subunit alpha,transforming growth factor, beta receptor 1,transforming growth factor, beta 1,jun proto-oncogene,FBJ murine osteosarcoma viral oncogene homolog,nuclear factor of kappa light polypeptide gene enhancer in B-cells inhibitor, alpha
path:hsa05169	10	193	86	5937	0.00106446	0.00355928	Epstein-Barr virus infection - Homo sapiens (human)	1027,960,7157,5290,5925,4609,3725,1017,3315,4792	CDKN1B,CD44,TP53,PIK3CA,RB1,MYC,JUN,CDK2,HSPB1,NFKBIA	cyclin-dependent kinase inhibitor 1B (p27, Kip1),CD44 molecule (Indian blood group),tumor protein p53,phosphatidylinositol-4,5-bisphosphate 3-kinase, catalytic subunit alpha,retinoblastoma 1,v-myc myelocytomatosis viral oncogene homolog (avian),jun proto-oncogene,cyclin-dependent kinase 2,heat shock 27kDa protein 1,nuclear factor of kappa light polypeptide gene enhancer in B-cells inhibitor, alpha
path:hsa04662	6	72	90	6058	0.00120677	0.00391285	B cell receptor signaling pathway - Homo sapiens (human)	5290,3845,5894,3725,2353,4792	PIK3CA,KRAS,RAF1,JUN,FOS,NFKBIA	phosphatidylinositol-4,5-bisphosphate 3-kinase, catalytic subunit alpha,v-Ki-ras2 Kirsten rat sarcoma viral oncogene homolog,v-raf-1 murine leukemia viral oncogene homolog 1,jun proto-oncogene,FBJ murine osteosarcoma viral oncogene homolog,nuclear factor of kappa light polypeptide gene enhancer in B-cells inhibitor, alpha
path:hsa04660	7	101	89	6029	0.00130456	0.00410552	T cell receptor signaling pathway - Homo sapiens (human)	3725,5290,3845,387,5894,2353,4792	JUN,PIK3CA,KRAS,RHOA,RAF1,FOS,NFKBIA	jun proto-oncogene,phosphatidylinositol-4,5-bisphosphate 3-kinase, catalytic subunit alpha,v-Ki-ras2 Kirsten rat sarcoma viral oncogene homolog,ras homolog family member A,v-raf-1 murine leukemia viral oncogene homolog 1,FBJ murine osteosarcoma viral oncogene homolog,nuclear factor of kappa light polypeptide gene enhancer in B-cells inhibitor, alpha
path:hsa05202	9	171	87	5959	0.00172007	0.0052585	Transcriptional misregulation in cancer - Homo sapiens (human)	3206,1027,7157,4914,5747,5155,3486,4609,5468	HOXA10,CDKN1B,TP53,NTRK1,PTK2,PDGFB,IGFBP3,MYC,PPARG	homeobox A10,cyclin-dependent kinase inhibitor 1B (p27, Kip1),tumor protein p53,neurotrophic tyrosine kinase, receptor, type 1,PTK2 protein tyrosine kinase 2,platelet-derived growth factor beta polypeptide,insulin-like growth factor binding protein 3,v-myc myelocytomatosis viral oncogene homolog (avian),peroxisome proliferator-activated receptor gamma
path:hsa05168	9	173	87	5957	0.00185669	0.00551849	Herpes simplex infection - Homo sapiens (human)	6352,7157,9641,1936,3725,2353,1017,9021,4792	CCL5,TP53,IKBKE,EEF1D,JUN,FOS,CDK2,SOCS3,NFKBIA	chemokine (C-C motif) ligand 5,tumor protein p53,inhibitor of kappa light polypeptide gene enhancer in B-cells, kinase epsilon,eukaryotic translation elongation factor 1 delta (guanine nucleotide exchange protein),jun proto-oncogene,FBJ murine osteosarcoma viral oncogene homolog,cyclin-dependent kinase 2,suppressor of cytokine signaling 3,nuclear factor of kappa light polypeptide gene enhancer in…
path:hsa04210	6	81	90	6049	0.00212326	0.00614025	Apoptosis - Homo sapiens (human)	7157,572,4914,8743,5290,4792	TP53,BAD,NTRK1,TNFSF10,PIK3CA,NFKBIA	tumor protein p53,BCL2-associated agonist of cell death,neurotrophic tyrosine kinase, receptor, type 1,tumor necrosis factor (ligand) superfamily, member 10,phosphatidylinositol-4,5-bisphosphate 3-kinase, catalytic subunit alpha,nuclear factor of kappa light polypeptide gene enhancer in B-cells inhibitor, alpha

## Sheet: C4
PATHWAY	#HIT_SET	#HIT_BG	#NOHIT_SET	#NOHIT_BG	PVALUE	FDRADJ	DESC	GENES-IN-SET-WITH-PATHWAY	GENE-SYMBOL	GENE-NAME
path:hsa05200	15	313	58	5840	4.33629e-06	0.000388414	Pathways in cancer - Homo sapiens (human)	1287,5594,4318,1029,284217,3576,1612,5291,355,3065,4089,1030,2113,2260,7482	COL4A5,MAPK1,MMP9,CDKN2A,LAMA1,IL8,DAPK1,PIK3CB,FAS,HDAC1,SMAD4,CDKN2B,ETS1,FGFR1,WNT2B	collagen, type IV, alpha 5,mitogen-activated protein kinase 1,matrix metallopeptidase 9 (gelatinase B, 92kDa gelatinase, 92kDa type IV collagenase),cyclin-dependent kinase inhibitor 2A,laminin, alpha 1,interleukin 8,death-associated protein kinase 1,phosphatidylinositol-4,5-bisphosphate 3-kinase, catalytic subunit beta,Fas (TNF receptor superfamily, member 6),histone deacetylase 1,SMAD family mem…
path:hsa05219	6	36	67	6117	7.92682e-06	0.000388414	Bladder cancer - Homo sapiens (human)	5594,4318,1029,3576,1612,1890	MAPK1,MMP9,CDKN2A,IL8,DAPK1,TYMP	mitogen-activated protein kinase 1,matrix metallopeptidase 9 (gelatinase B, 92kDa gelatinase, 92kDa type IV collagenase),cyclin-dependent kinase inhibitor 2A,interleukin 8,death-associated protein kinase 1,thymidine phosphorylase
